# Supplementary material
Source: MDPI journal article supplement (https://www.mdpi.com/2076-3417/12/19/10159)

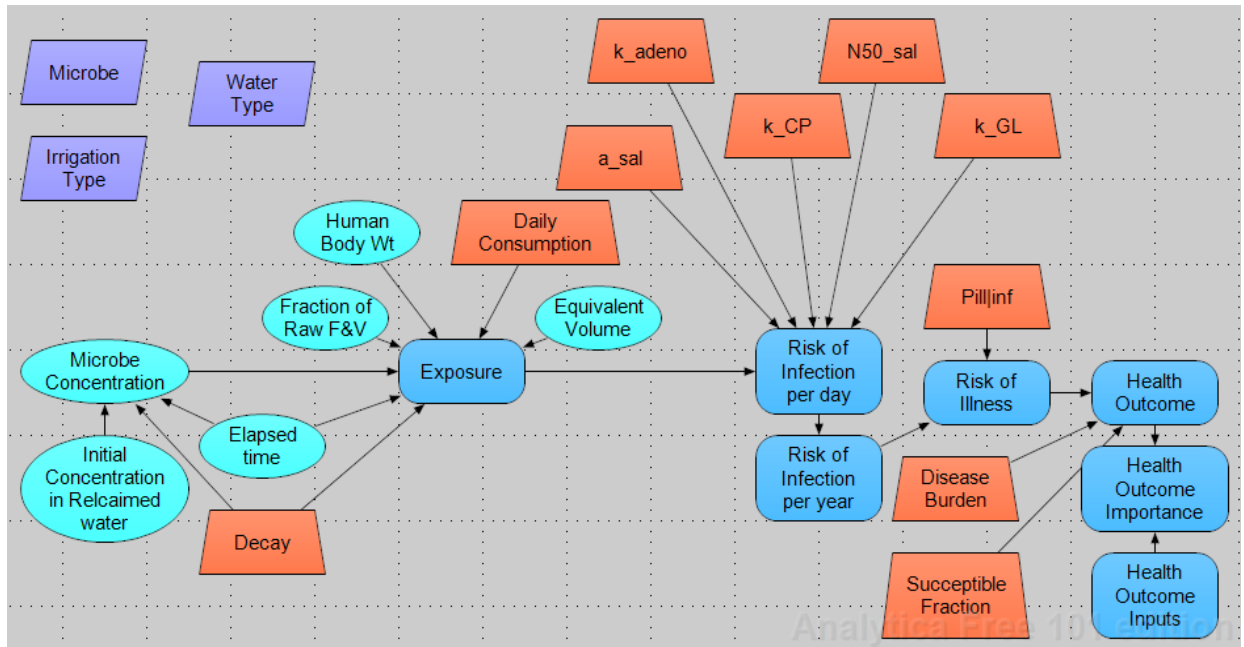

**Figure S1.** Analytica diagram of agricultural reuse model.

Supplement: s1 [file s1 › applsci-1951845-supplementary.pdf]
